# Supplementary material for: Evaluation of Climate Prediction Models in Yunnan, China: Traditional Methods and AI Approaches
Source: Research Square preprint supplement (doi:10.21203/rs.3.rs-7356043/v1), 2025-09-04
Supplement: Supplementary file 2 [file 6fb271e1ab72048a068cfa60.pdf]

## Appendix 2: Explanation of the Model Total Score Calculation Process

This appendix explains the principles and methods used to calculate the comprehensive scores for each model, aiming to demonstrate how the final model performance scores are obtained through standardization and weighted averaging based on the original evaluation indicators. This method references common practices in multi-indicator integrated evaluation, offering good versatility and transparency, and can scientifically reflect the overall performance level of the model under multi-variable and multi-indicator conditions.

### Scoring Design Method

This scoring method is based on three commonly used metrics: root mean square error (RMSE), mean absolute error (MAE), and Pearson correlation coefficient (R), and calculates weighted averages for the training set, validation set, and test set. The specific scoring process is as follows:

#### 1. Metric Normalization

For RMSE and MAE: Use maximum value inverse normalization (lower values result in higher scores):

$$N_{RMSE/MAE} = 1 - \frac{x}{x_{max}} \quad (A1)$$

For R values: Use maximum positive normalization (the higher the value, the higher the score):

$$N_R = \frac{x}{x_{max}} \quad (A2)$$

#### 2. Single variable indicator scoring

For each indicator (RMSE, MAE, R) of each model, calculate the weighted average separately for the training set, validation set, and test set (the same applies to MAE and R):

$$S_{RMSE} = \frac{1}{3} (N_{Train\_RMSE} + N_{Val\_RMSE} + N_{Test\_RMSE}) \quad (A3)$$

#### 3. Single variable scoring

For each meteorological variable (temperature, precipitation, relative humidity),

scores are calculated separately under three evaluation indicators:

$$S_{T/P/H} = \frac{1}{3} (S_{RMSE} + S_{MAE} + S_R) \quad (A4)$$

#### 4. Calculation of total score

The final total score is the weighted average of the three scores for temperature, precipitation, and humidity:

$$S_{total} = \frac{1}{3} (S_T + S_P + S_H) \quad (A5)$$

#### Variable Scoring Table

Table A1 Temperature (T) Variable Scoring Details

| Model            | T_RMSE score | T_MAE score | T_R score | T_Total score |
|------------------|--------------|-------------|-----------|---------------|
| RegCM            | 0.0000       | 0.0000      | 0.8541    | 0.2847        |
| CNN              | 0.3911       | 0.3407      | 0.9516    | 0.5611        |
| LSTM             | 0.7123       | 0.6572      | 0.9939    | 0.7878        |
| Transformer      | 0.4904       | 0.4164      | 0.9668    | 0.6245        |
| CNN-LSTM         | 0.7713       | 0.7229      | 0.9987    | 0.8309        |
| LSTM-Transformer | 0.7913       | 0.7497      | 1.0000    | 0.8470        |

Table A2: Detailed evaluation of precipitation (P) variables

| Model            | T_RMSE score | T_MAE score | T_R score | P_Total score |
|------------------|--------------|-------------|-----------|---------------|
| RegCM            | 0.3387       | 0.2290      | 0.5170    | 0.3616        |
| CNN              | 0.3541       | 0.2639      | 0.9660    | 0.5280        |
| LSTM             | 0.3022       | 0.2792      | 0.8853    | 0.4889        |
| Transformer      | 0.0000       | 0.0000      | 0.5237    | 0.1746        |
| CNN-LSTM         | 0.4118       | 0.4126      | 1.0000    | 0.6081        |
| LSTM-Transformer | 0.3996       | 0.3636      | 0.9782    | 0.5805        |

Table A3 Relative Humidity (H) Variable Evaluation Details

| Model            | T_RMSE score | T_MAE score | T_R score | H_Total score |
|------------------|--------------|-------------|-----------|---------------|
| RegCM            | 0.3819       | 0.4761      | 0.8710    | 0.5763        |
| CNN              | 0.4082       | 0.3599      | 0.9557    | 0.5746        |
| LSTM             | 0.3879       | 0.3790      | 0.9745    | 0.5805        |
| Transformer      | 0.0000       | 0.0000      | 0.8754    | 0.2918        |
| CNN-LSTM         | 0.5099       | 0.4985      | 0.9947    | 0.6677        |
| LSTM-Transformer | 0.5322       | 0.5238      | 1.0000    | 0.6853        |

Table A4 Summary of Model Total Scores

| Model            | T_Total score | P_Total score | H_Total score | S_Overall score |
|------------------|---------------|---------------|---------------|-----------------|
| RegCM            | 0.2847        | 0.3616        | 0.5763        | 0.4075          |
| CNN              | 0.5611        | 0.5280        | 0.5746        | 0.5546          |
| LSTM             | 0.7878        | 0.4889        | 0.5805        | 0.6191          |
| Transformer      | 0.6245        | 0.1746        | 0.2918        | 0.3636          |
| CNN-LSTM         | 0.8309        | 0.6081        | 0.6677        | 0.7022          |
| LSTM-Transformer | 0.8470        | 0.5805        | 0.6853        | 0.7043          |
